# Supplementary material for: Multi-layer co-extrusion blow molding
Source: publisher site journal article supplement (doi:10.1515/ipp-2023-4413), 2023-12-21
Supplement: Supplementary file 2 [file j_ipp-2023-4413_suppl_001.docx]

**Supplementary Information**


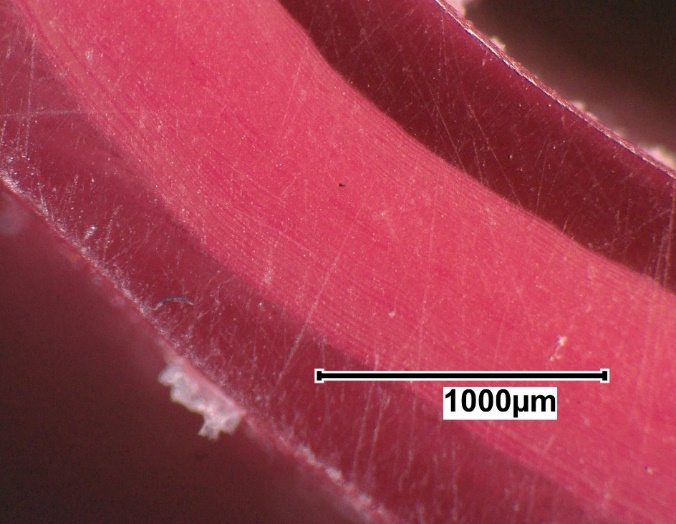

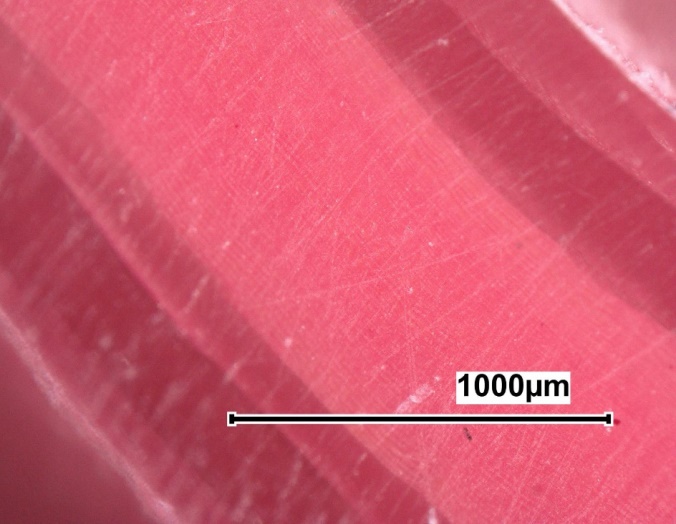

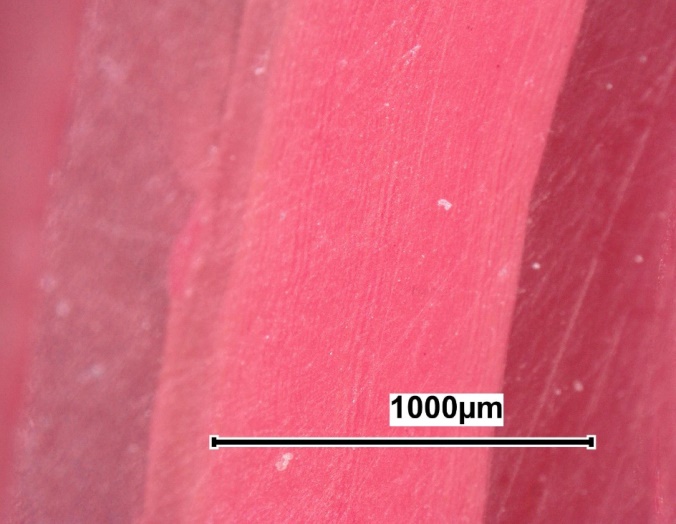

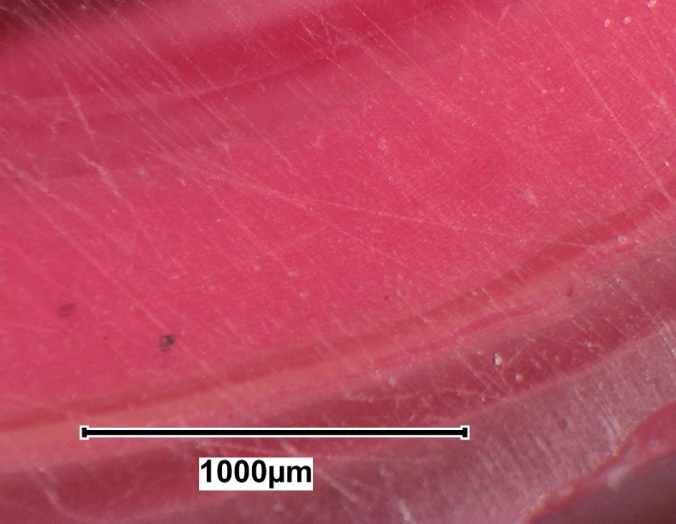


(b)

(c)

(d)

(a)

**Supplementary Figure 1** Pre-heat HVM samples cross sections at different velocity ratios (a) 0.23 (b) 0.57 (c) 0.69 (d) 1.15


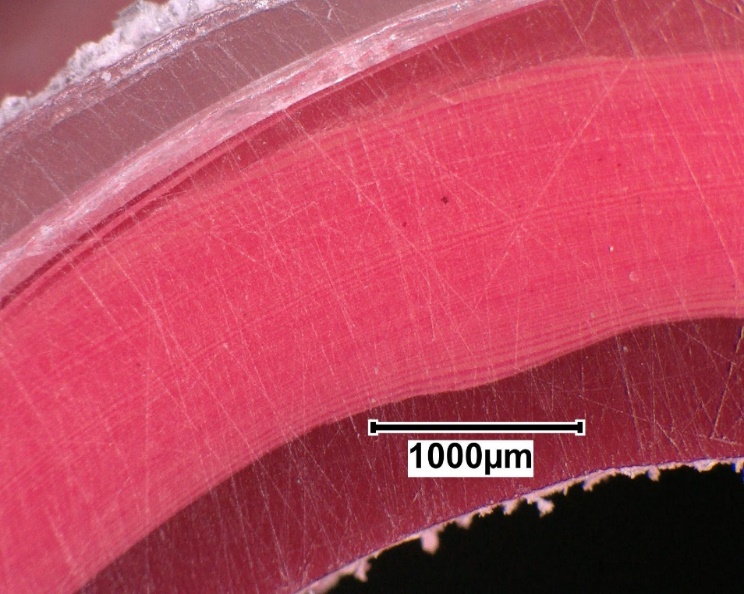

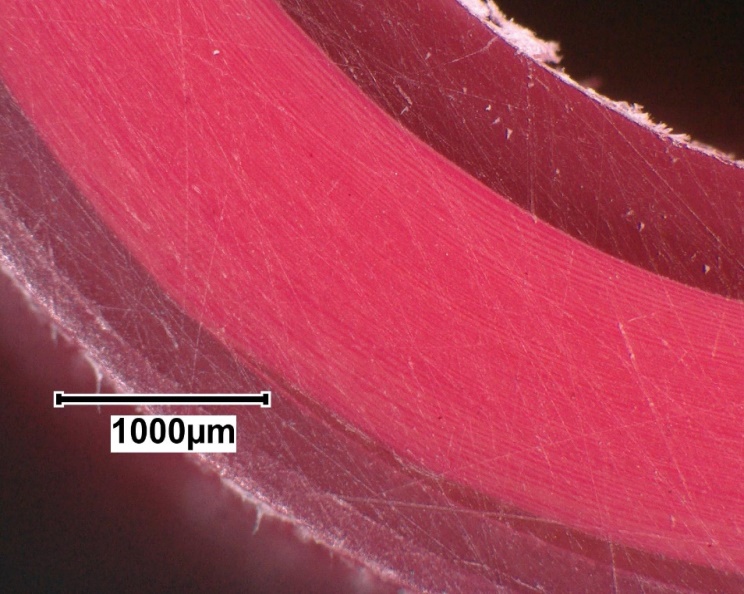

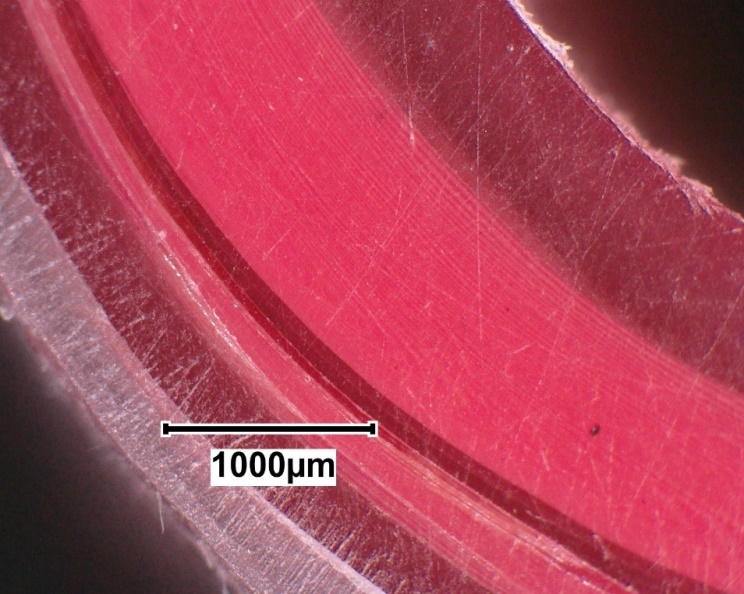

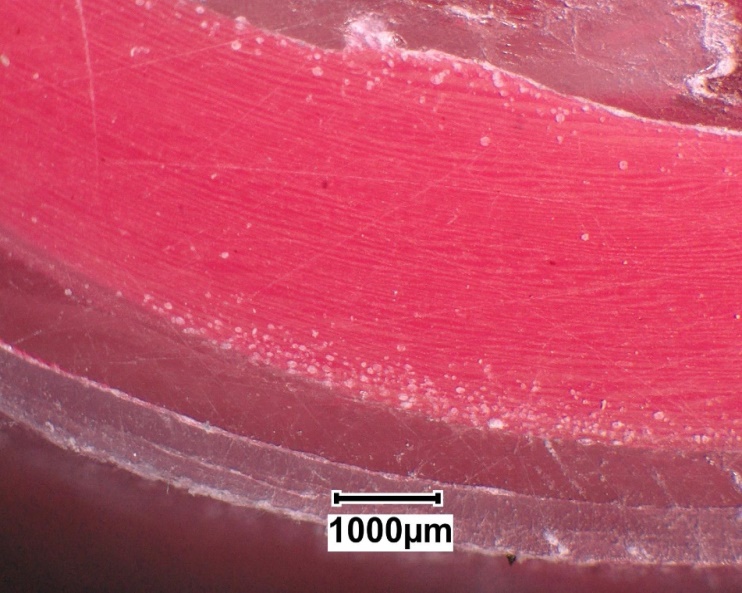


(b)

(c)

(d)

(a)


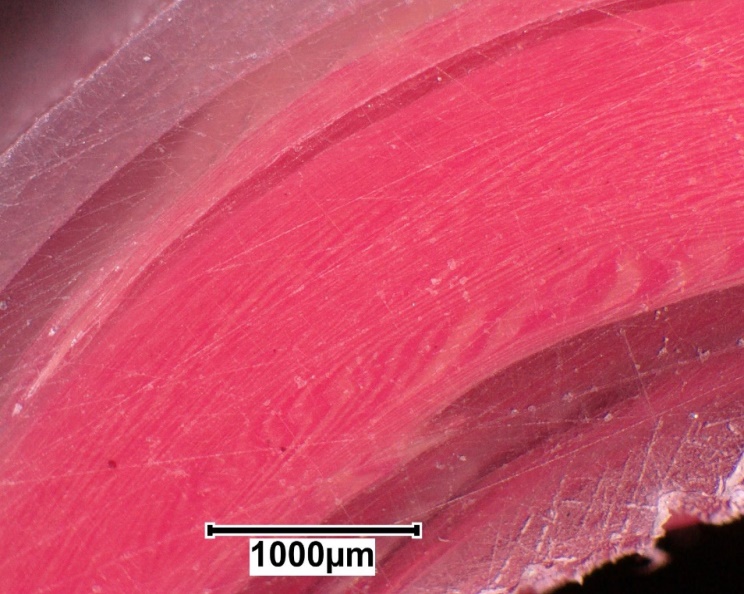


(e)

**Supplementary Figure 2** Pre-heat LVM samples cross sections at different velocity ratios (a) 0.35 (b) 0.46 (c) 0.57 (d) 0.69 (e) 1.15

**Supplementary Figure 3** Post-heat HVM samples cross sections at different velocity ratios (a) 0.23 (b) 0.57 (c) 0.69 (d) 1.15


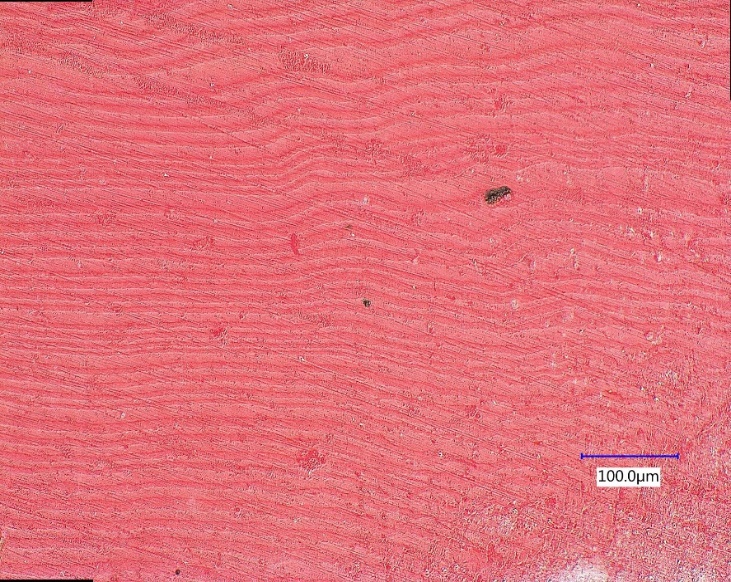

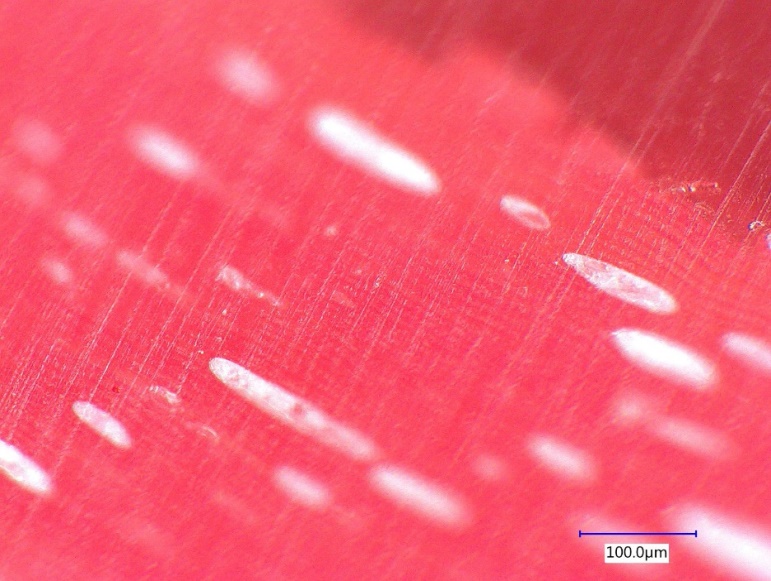

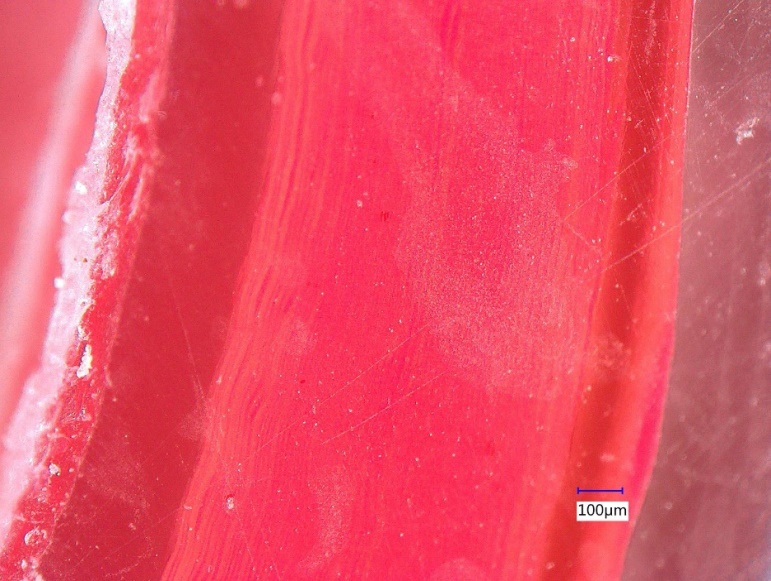

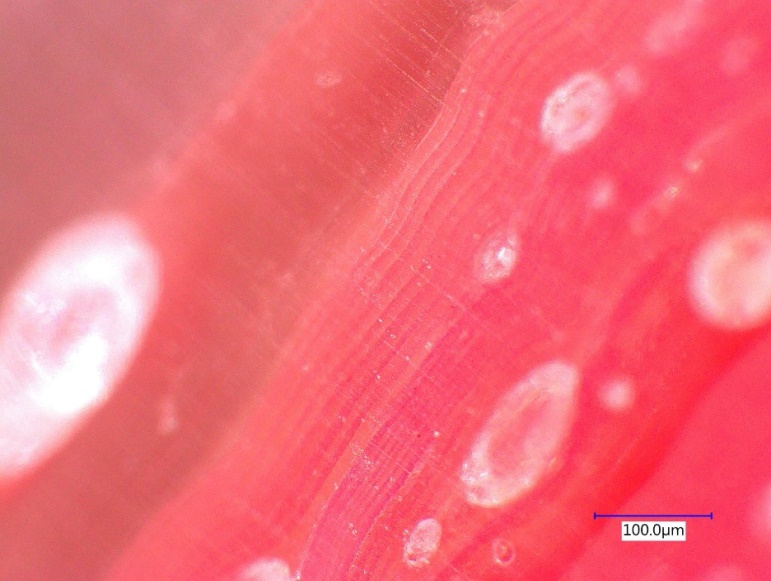


(b)

(c)

(d)

(a)

**Supplementary Figure 4** Post-heat LVM samples cross sections at different velocity ratios (a) 0.35 (b) 0.46 (c) 0.57 (d) 0.69 (e) 1.15


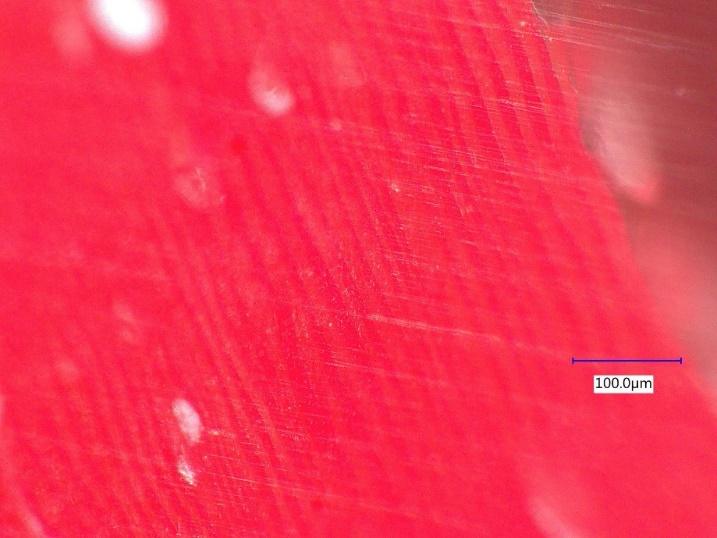

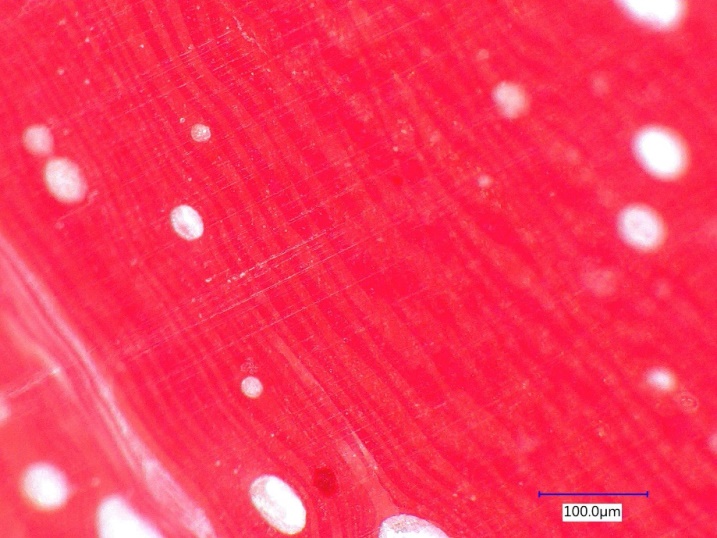

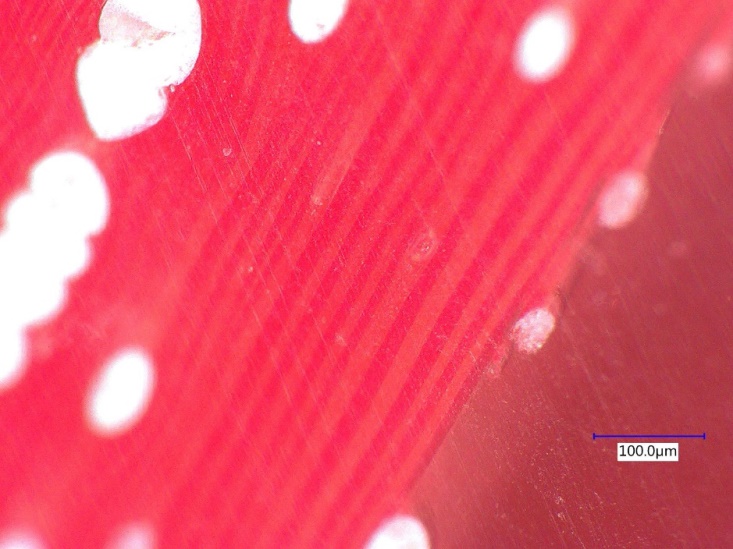

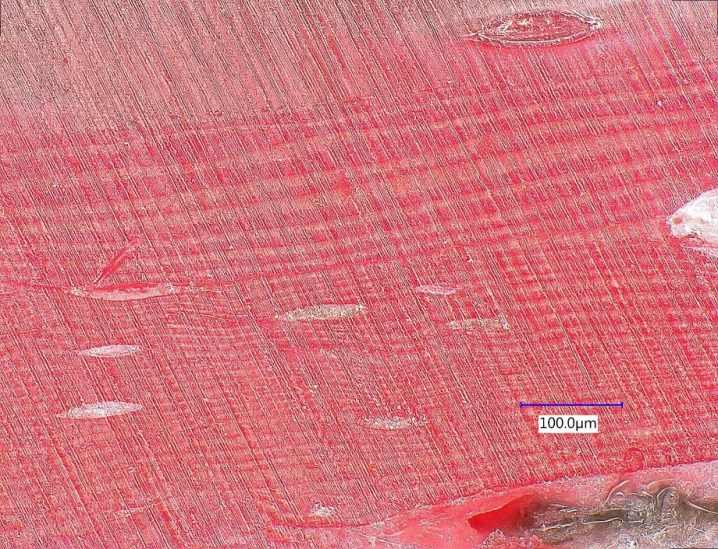

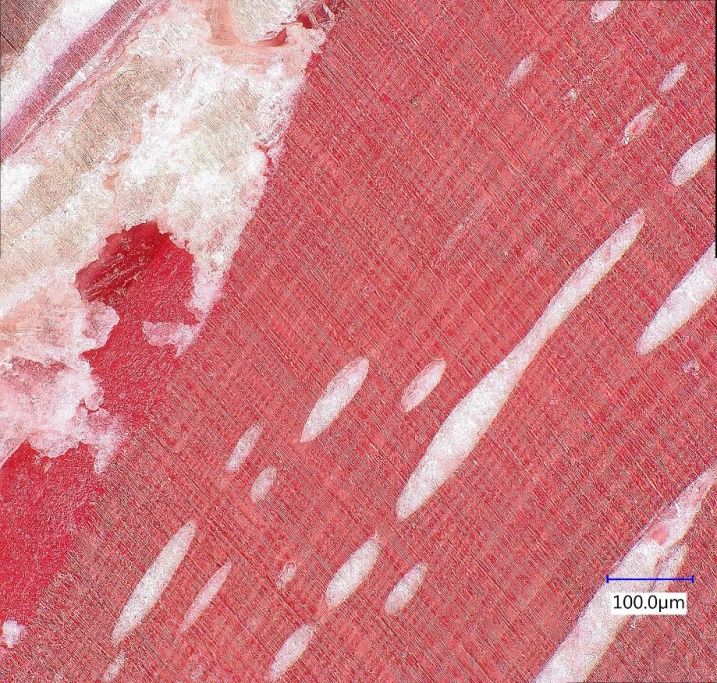


(b)

(c)

(d)

(a)

(e)


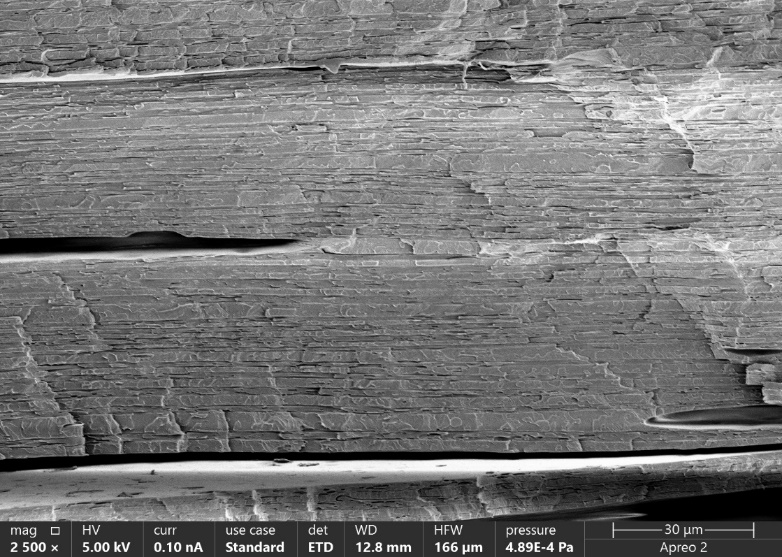

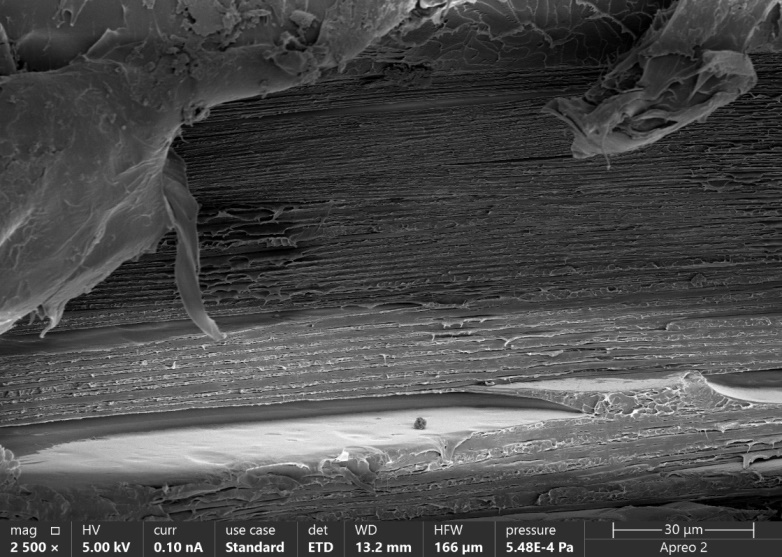

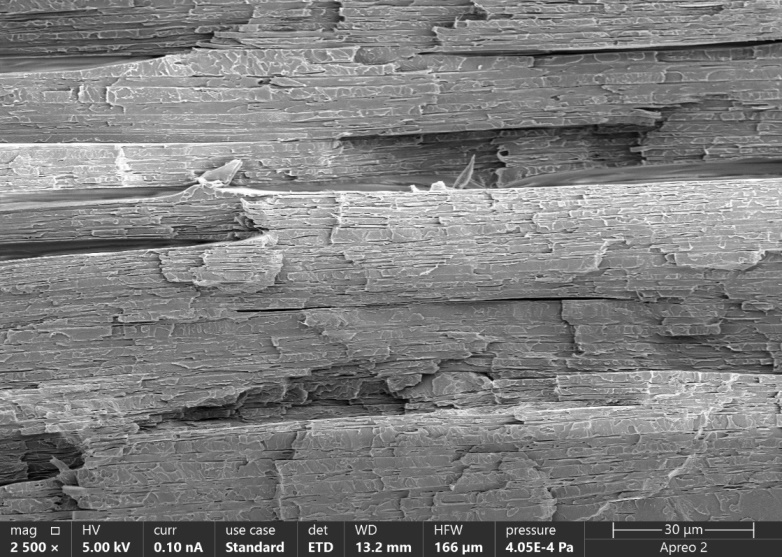

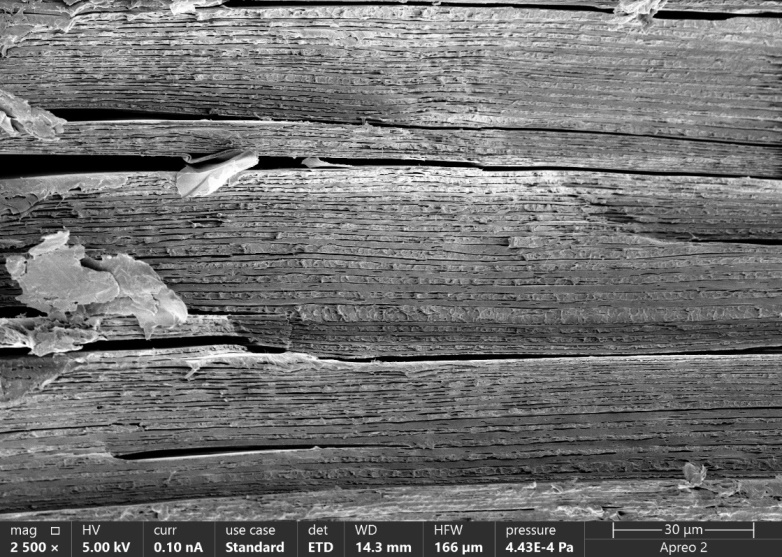


(b)

(c)

(d)

(a)

**Supplementary Figure 5** Blown HVM samples cross sections at different velocity ratios (a) 0.23 (b) 0.57 (c) 0.69 (d) 1.15

**Supplementary Figure 6** Blown LVM samples cross sections at different velocity ratios (a) 0.35 (b) 0.46 (c) 0.57 (d) 0.69 (e) 1.15


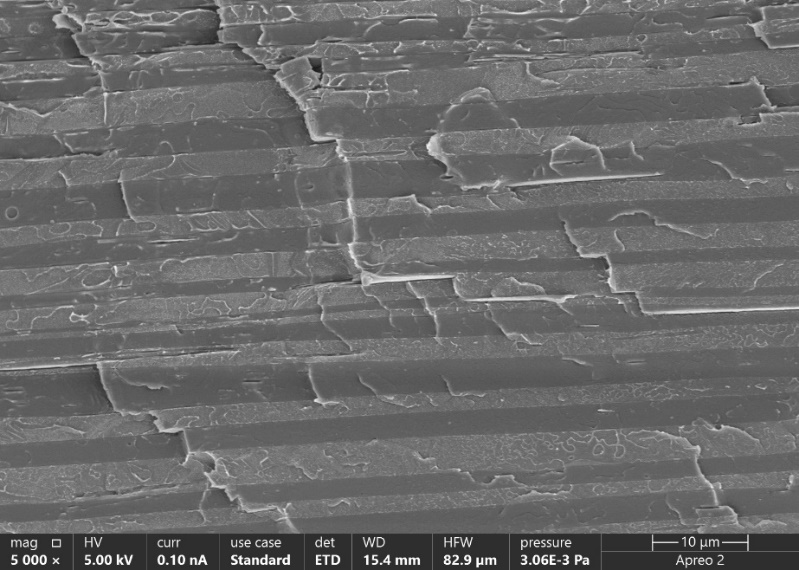

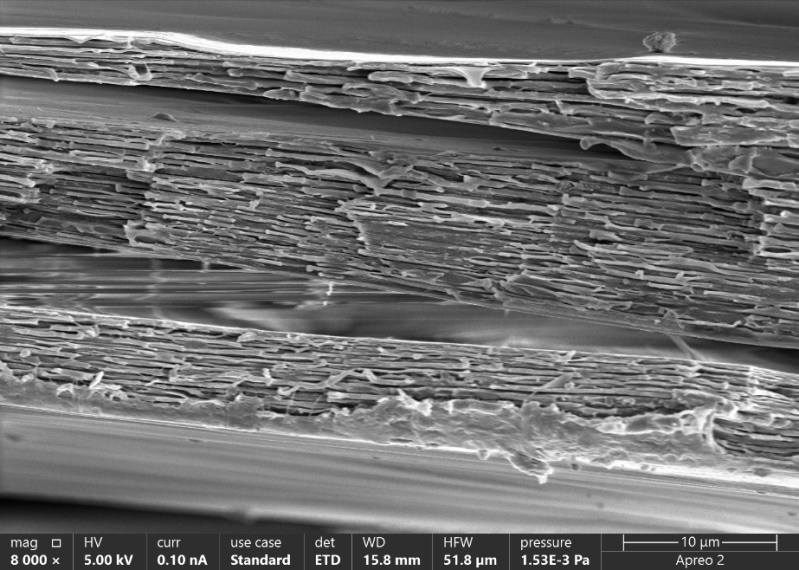

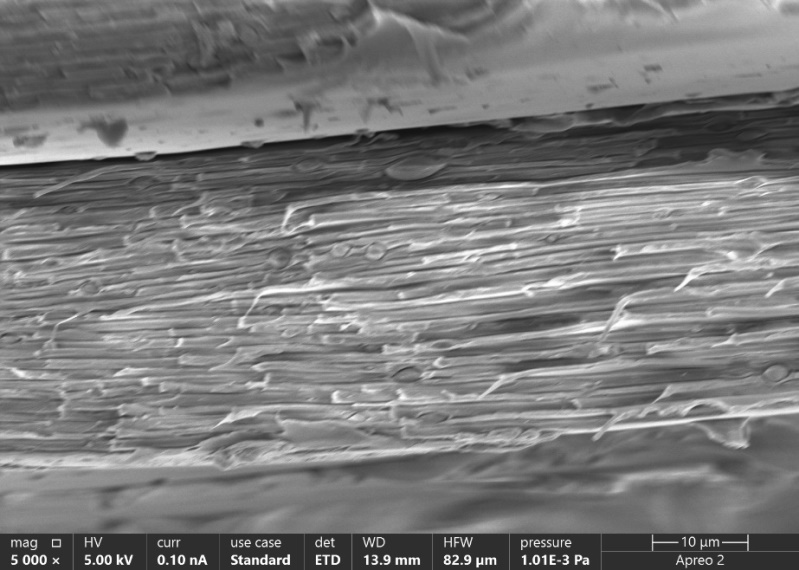

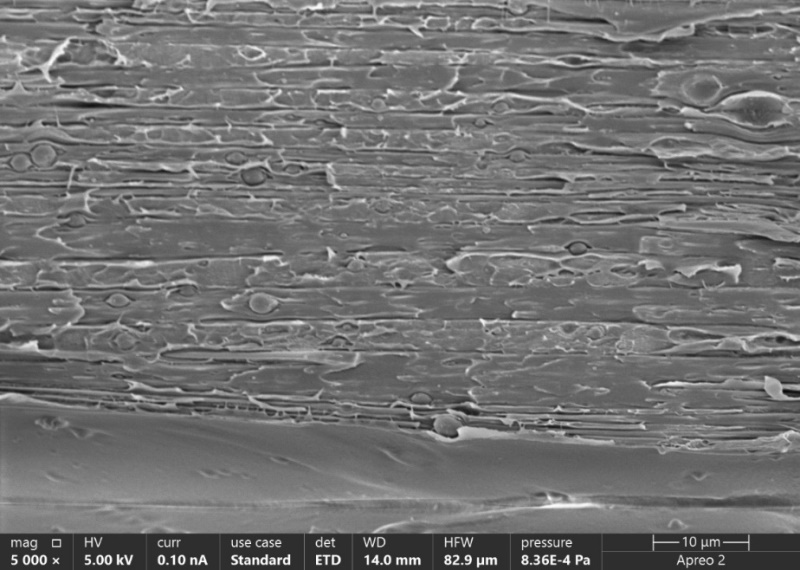

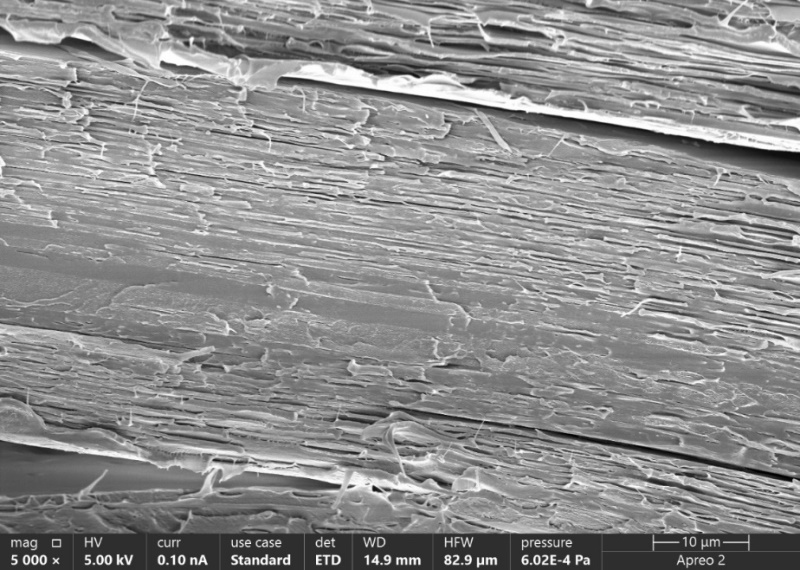


(b)

(c)

(d)

(a)

(e)

| HVM Samples | |
| --- | --- |
| 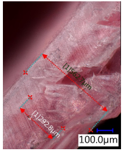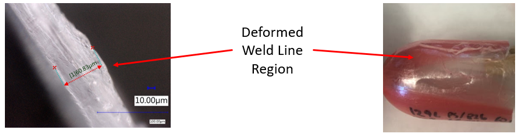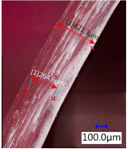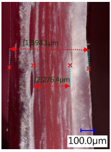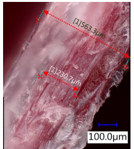  VR 0.23 | 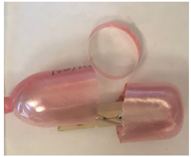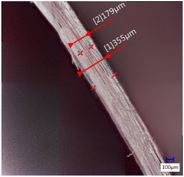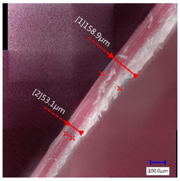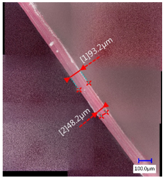  VR 0.69 |
| 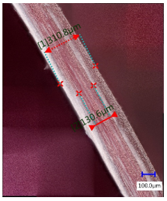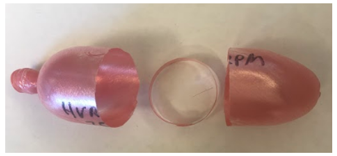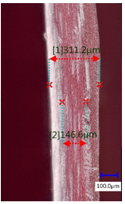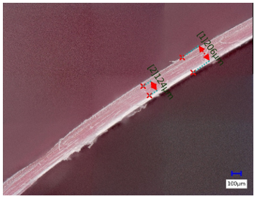  VR 0.58 | 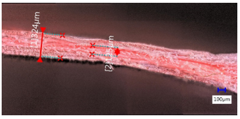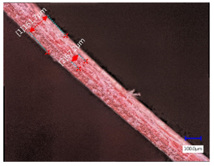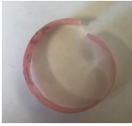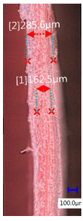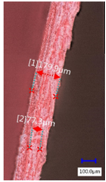  VR 1.15 |

**Supplementary Table 1** Cross-section images of HVM system at different velocity ratios used for wall thickness measurements

| LVM Samples | |
| --- | --- |
| 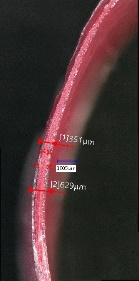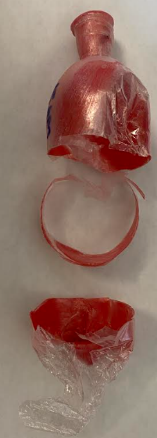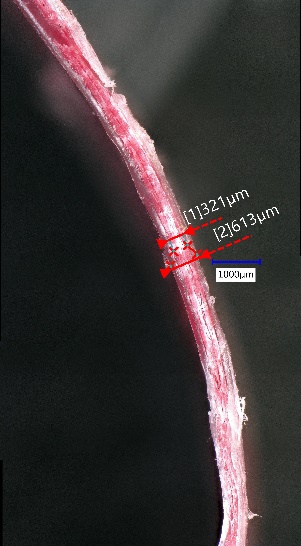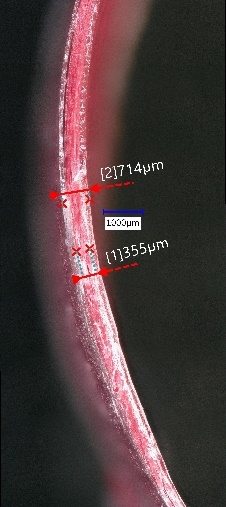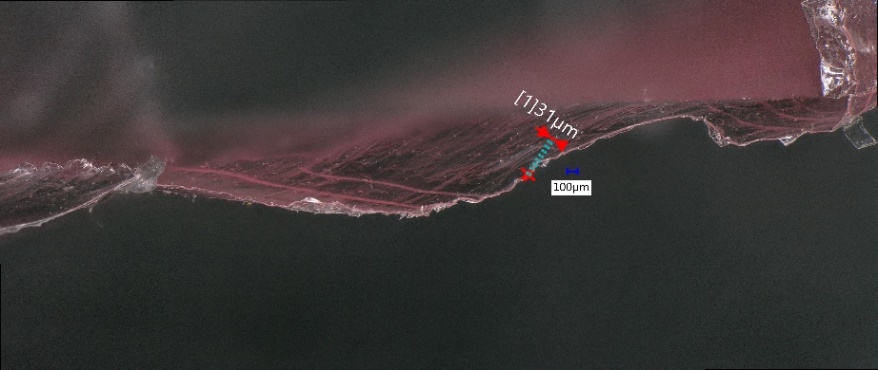  VR 0.35 | 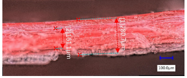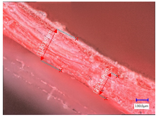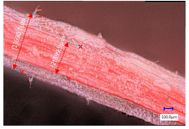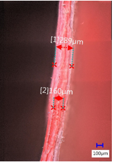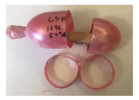  VR 0.46 |
| 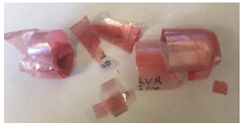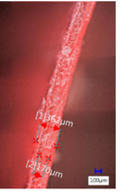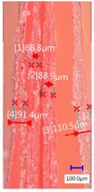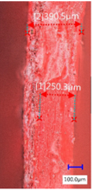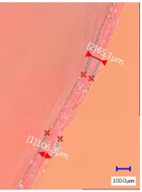  VR 0.58 | 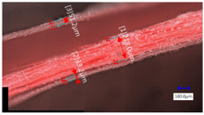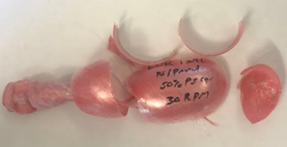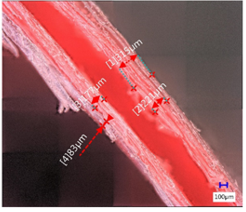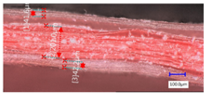  VR 0.69 |
| 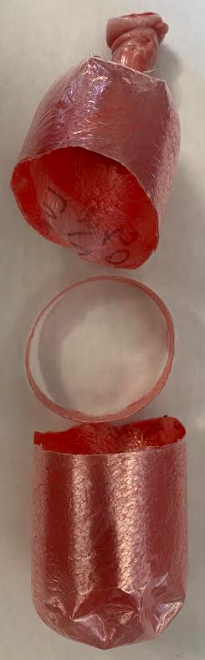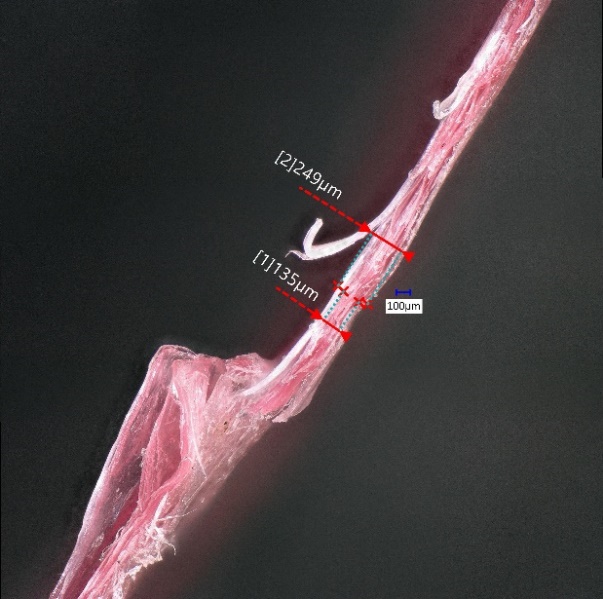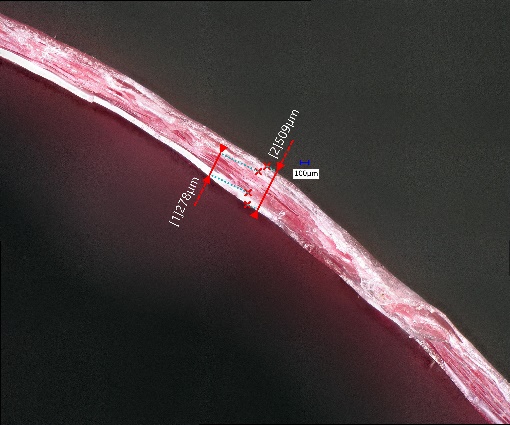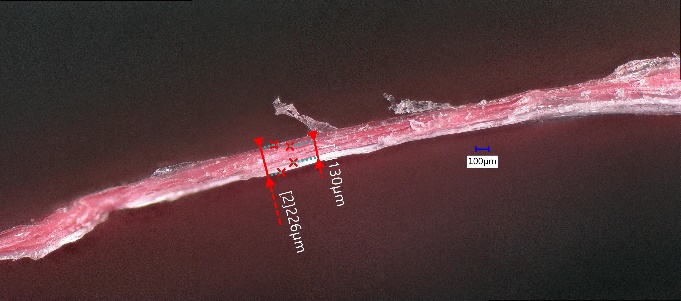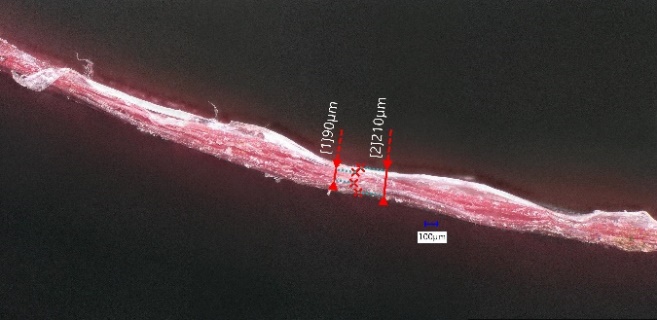  VR 1.15 | |

**Supplementary Table 2** Cross-section images of LVM system at different velocity ratios used for wall thickness measurements
